# Supplementary material for: Targeting the 5′ untranslated region of SMN2 as a therapeutic strategy for spinal muscular atrophy
Source: PubMed Central journal article supplement (PMC7851419; doi:10.1016/j.omtn.2020.12.027), 2021-01-05
Supplement: mmc1.pdf [file mmc1.pdf]

OMTN, Volume 23

## **Supplemental Information**

### **Targeting the 5' untranslated region of *SMN2* as a therapeutic strategy for spinal muscular atrophy**

**Audrey M. Winkelsas, Christopher Grunseich, George G. Harmison, Katarzyna Chwalenia, Carlo Rinaldi, Suzan M. Hammond, Kory Johnson, Melissa Bowerman, Sukrat Arya, Kevin Talbot, Matthew J. Wood, and Kenneth H. Fischbeck**

**Table S1. Properties of ASOs used in experiments.**

The first 7 ASOs listed were fully modified with 2'-O-methyl (2'-OMe) bases and phosphorothioate (PS) linkages. The non-targeting control (NTC) ASO uses the “Standard Control” sequence which was described by Gene Tools, LLC as having no RNA target and minimal biological activity. The middle 3 ASOs were fully modified with 2'-O-methoxyethyl (2'-MOE) bases and phosphorothioate (PS) linkages. The final 2 ASOs were in the phosphorodiamidate morpholino oligomer (PMO) chemistry.

| Sequence name          | ASO sequence (5' -> 3')   | Chemistry | % GC  |
|------------------------|---------------------------|-----------|-------|
| ASO #1                 | GUUAUCGCCCUCCCACAUUUGUGG  | 2'-OMe    | 54.2  |
| ASO #2                 | UGGUUAUCGCCCUCCCACAUUUGU  | 2'-OMe    | 50.0  |
| ASO #3                 | AGUGGUUAUCGCCCUCCCACAUUU  | 2'-OMe    | 50.0  |
| ASO #4                 | CGAGUGGUUAUCGCCCUCCCACAU  | 2'-OMe    | 58.3  |
| ASO #5                 | UACGAGUGGUUAUCGCCCUCCCAC  | 2'-OMe    | 58.3  |
| ASO #6                 | UUCUGGGAGCGGAACAGUACGGUG  | 2'-OMe    | 58.3  |
| NTC                    | CCUCUUACCUCAGUUACAAUUUAUA | 2'-OMe    | 32.0  |
|                        |                           |           |       |
| 5'UTR ASO              | GUUAUCGCCCUCCCACAUUUGUGG  | 2'-MOE    | 54.2  |
| NTC                    | CCUCUUACCUCAGUUACAAUUUAUA | 2'-MOE    | 32.0  |
| Scrambled              | GUGGUCGCAUUUCCUCGUUACCAC  | 2'-MOE    | 54.2  |
|                        |                           |           |       |
| 5'UTR pPMO             | TGGTTATCGCCCTCCCACATTTGTG | PMO       | 52.0  |
| DM1 pPMO <sup>63</sup> | CAGCAGCAGCAGCAGCAGCAG     | PMO       | 66.7% |

**Table S2. SMA iPSC lines used for motor neuron differentiation.**

| <b>iPSC line name</b>         | <b>Gender</b> | <b>Age at biopsy</b> | <b>Reprogramming method</b>            | <b>Genotype</b>                                             | <b>Disease</b>             |
|-------------------------------|---------------|----------------------|----------------------------------------|-------------------------------------------------------------|----------------------------|
| SMA A4                        | F             | 109 days             | STEMCCA<br>Lentivirus<br>Reprogramming | Homozygous<br><i>SMN1</i> deletion,<br>2 copies <i>SMN2</i> | SMA<br>Type 1              |
| RS 1.2                        | M             | 74 days              | STEMCCA<br>Lentivirus<br>Reprogramming |                                                             | Age-<br>matched<br>control |
| IPS-OXSMA-03<br>(Clone 03 03) | M             | 49 years             | CytoTune<br>Sendai<br>Reprogramming    | Homozygous<br><i>SMN1</i> deletion,<br>3 copies <i>SMN2</i> | SMA<br>Type 2              |
| IPS-OXSMA-02<br>(Clone 02 04) | M             | 30 years             | CytoTune<br>Sendai<br>Reprogramming    | Homozygous<br><i>SMN1</i> deletion,<br>4 copies <i>SMN2</i> | SMA<br>Type 3              |
| OX1<br>(Clone 841-03-01)      | M             | 36 years             | CytoTune<br>Sendai<br>Reprogramming    |                                                             | Age-<br>matched<br>control |

**Table S3. Primers for gene expression analysis by qRT-PCR.**

| RNA       | Primer name  | Primer sequences (5' -> 3') | Chemistry  | T <sub>a</sub> (°C) |
|-----------|--------------|-----------------------------|------------|---------------------|
| FL-SMN    | FL-SMN qF    | GCTTTGGGAAGTATGTTAATTTCA    | Sybr Green | 60                  |
|           | FL-SMN qR    | CTATGCCAGCATTTCCTTAATT      |            |                     |
| SMNΔ7     | SMNΔ7 qF     | CCACCACCCCACTTACTATCA       | Sybr Green | 60                  |
|           | SMNΔ7 qR     | GCTCTATGCCAGCATTTCATA       |            |                     |
| Total SMN | Total SMN qF | GCGATGATTCTGACATTTGG        | Sybr Green | 60                  |
|           | Total SMN qR | GGAAGCTGCAGTATTCTTCT        |            |                     |
| GAPDH     | GAPDH qF     | CTCAACGACCACTTTGTCAAGCTC    | Sybr Green | 60                  |
|           | GAPDH qR     | TCTTACTCCTTGGAGGCCATGT      |            |                     |

**Table S4. Primers for *SMN2* exon 7 inclusion RT-PCR.**

| Primer name  | Primer sequences (5' -> 3') | T <sub>a</sub> (°C) |
|--------------|-----------------------------|---------------------|
| SMN PAGE Fwd | AGGTCTAAAATTCAATGGCCCA      | 60                  |
| SMN PAGE Rev | GTGTCATTTAGTGCTGCTCTATGC    |                     |

**Table S5. Confirming Click-iT assay specificity to nascent RNA.**

Before the 5-ethynyl uridine pulse, fibroblasts were treated with actinomycin D to prevent transcription and serve as an experimental control. Those samples have higher qRT-PCR  $C_t$  values (less amplification of *SMN* and *GAPDH*) than samples not treated with actinomycin D. Values shown are mean plus or minus standard deviation.  $n = 3$ .

|                      | Average $C_t$ <i>SMN</i>           | Average $C_t$ <i>GAPDH</i>         |
|----------------------|------------------------------------|------------------------------------|
| NTC ASO              | $27.41 \pm 0.46$                   | $25.94 \pm 0.08$                   |
| 5'UTR ASO            | $26.49 \pm 0.81$                   | $25.40 \pm 0.62$                   |
| Untreated            | $27.20 \pm 0.73$                   | $25.99 \pm 0.61$                   |
| <b>Actinomycin D</b> | <b><math>34.04 \pm 0.60</math></b> | <b><math>29.99 \pm 0.39</math></b> |
| Carrier              | $25.47 \pm 0.05$                   | $25.92 \pm 0.21$                   |

**Table S6. Double-stranded DNA fragments used in plasmid construction.**

All sequences purchased as gBlocks Gene Fragments or Ultramer DNA Oligos from IDT. Lower case letters indicate intronic sequence.

| DNA name                                             | Sequence (5' -> 3')                                                                                                                                                                                                                                                                                                                                                                                                                                                                                                                                                                                                                                                                                                                                                                                                                                                                                                                                                                                                                                                                                                                                                                                                                                                                                                                                                                                                                                                                                                                                                                                                                                                                                                                                                                                                                                                                                                                                                                                                                                                                                                                                                                                                                                                                                                                                      |
|------------------------------------------------------|----------------------------------------------------------------------------------------------------------------------------------------------------------------------------------------------------------------------------------------------------------------------------------------------------------------------------------------------------------------------------------------------------------------------------------------------------------------------------------------------------------------------------------------------------------------------------------------------------------------------------------------------------------------------------------------------------------------------------------------------------------------------------------------------------------------------------------------------------------------------------------------------------------------------------------------------------------------------------------------------------------------------------------------------------------------------------------------------------------------------------------------------------------------------------------------------------------------------------------------------------------------------------------------------------------------------------------------------------------------------------------------------------------------------------------------------------------------------------------------------------------------------------------------------------------------------------------------------------------------------------------------------------------------------------------------------------------------------------------------------------------------------------------------------------------------------------------------------------------------------------------------------------------------------------------------------------------------------------------------------------------------------------------------------------------------------------------------------------------------------------------------------------------------------------------------------------------------------------------------------------------------------------------------------------------------------------------------------------------|
| gBlocks: <i>SMN2</i><br>5'UTR + eGFP<br>+ <i>HBB</i> | CCACAAATGTGGGAGGGCGATAACCACTCGTAGAAAGCGTGAGAAGTTACT<br>ACAAGCGGTCCCTCCCGGCCACCGTACTGTTCCGCTCCCAGAAGCCCCGGGC<br>GGCGAAGTCGTCACTCTTAAGAAGGGACGGGGCCCCACGCTGCGCACCCG<br>CGGGTTTGCTATGGTGAGCAAGGGCGAGGAGCTGTTACCGGGGTGGTGCC<br>CATCCTGGTCGAGCTGGACGGCGACGTAACCGGCCACAAGTTCAGCGTGTC<br>CGGCGAGGGCGAGGGCGATGCCACCTACGGCAAGCTGACCTGAAGTTCAT<br>CTGCACCACCGGCAAGCTGCCCGTGCCCTGGCCCCACCCTCGTGACCACCCTG<br>ACCTACGGCGTGCAAGTTCAGCCGCTACCCCGACCACATGAAGCAGCAC<br>GACTTCTTCAAGTCCGCCATGCCCGAAGGCTACGTCCAGGAGCGCACCATC<br>TTCTTCAAGGACGACGGCAACTACAAGACCCGCGCCGAGGTGAAGTTCGAG<br>GGCGACACCCTGGTGAACCGCATCGAGCTGAAGGGCATCGACTTCAAGGAG<br>GACGGCAACATCCTGGGGCACAAGCTGGAGTACAACACTACAACAGCCACAA<br>CGTCTATATCATGGCCGACAAGCAGAAGAACGGCATCAAGGTGAACCTCAA<br>GATCCGCCACAACATCGAGGACGGCAGCGTGCAGCTCGCCGACCACTACCA<br>GCAGAACACCCCATCGGCGACGGCCCCGTGCTGCTGCCGACAACCACTA<br>CCTGAGCACCCAGTCCGCCCTGAGCAAAGACCCCAACGAGAAGCGCGATCA<br>CATGGTCCTGCTGGAGTTCGTGACCGCCGCCGGGATCACTCTCGGCATGGA<br>CGAGCTGTACAAGCTGCTGGTGGTCTACCCTTGGACCCAGAGGTTCTTTGAG<br>TCCTTTGGGGATCTGTCCACTCCTGATGCTGTTATGGGCAACCCTAAGGTGA<br>AGGCTCATGGCAAGAAAGTGCTCGGTGCCTTTAGTGATGGCCTGGCTCACC<br>TGGACAACCTCAAGGGCACCTTTGCCACACTGAGTGAGCTGCACTGTGACA<br>AGCTGCACGTGGATCCTGAGAACTTCAGGgtgagctatgggacgcttgatgtttcttcccttctt<br>ttctatggttaagttcatgtcataggaaggggataagtaaacagggtacagtttagaatgggaacagacgaatgattgcatcagt<br>gtggaagtctcaggatcgttttagttctttatttctgttcataacaattgtttctttttttaattcttgctttctttttctctccgca<br>attttactattatactaatgcctaacattgtgtatacaaaaaggaaatctctgagatacattaagtaacttaaaaaaaacttta<br>cacagctgccttagtacattactatttgaataatgtgtgcttattgcatattcataatctccctactttttttttattttaattgat<br>acataatcattatacatattatgggtaaaagtgaatgttttaatatgttacacatattgaccaaatcagggttaatttgcatttga<br>tttataaaaatgcttctcttttaataatactttttgttatcttatttctaactttccctaactcttcttcttcagggaataatgatacaat<br>gtatcatgcctcttgcaccattctaaagaataacagtataattctgggtaaggaatagcaatctctgcataaaatattctt<br>gcatataaattgaactgatgaagaggttcatattgctaataagcagctacaatccagctaccattctgctttatttatgtgtggg<br>ataaggctggattattctgagccaagctagccctttgctaatacatgttcatacctcttcttctcccccagCTCCTGG<br>GCAACGTGCTGGTCTGTGTGCTGGCCCATCACTTTGGCAAAGAATTCACCCC<br>ACCAGTGCAGGCTGCCTATCAGAAAGTGGTGGCTGGTGTGGCTAATGCCCT<br>GGCCACAAGTATCACTAAGCTCGCTTTCTTGCTGTCCAATTTCTATTAAAG<br>GTTCCCTTGTTCCTAAGTCCAACACTAACTGGGGGATATTATGAAGGGC<br>CTTGAGCATCTGGATTCTGCC |
| 5'UTR Frame<br>Shift mutation                        | GTCAGATCCGCTAGGGATCCCCACAAATGTGGGAGGGCGATAACCACTCGT<br>ACCGAAAGCGTGAGAAGTTACTACAAGCGGTCCCTCCCGGCCACCGTACTGT<br>TCCGCTCCCAGAAGCCCCGGGCGGCGAAGTCGTCACTCTTAAGAAGGGAC<br>GGGGCCCCACGCTGCGCACCCGCGGGTTTGCTATGGTGAGCAAGGGCGAGG<br>AGCTGTTACCGGGGTGGTGGCCATCCTGGTCGAGCTGGACGGCGACGTAA<br>ACGGCCACAAGTTCAGCGTGTCCGCGAGGGCGAGGGCGATGCCACCTACG<br>GCAAGCTGACCCTGAAGTTCATCTGCACCACCGCAAGCTGCCCGTGCCCT<br>GGCCACCCTCGTGACCACCCTGACCTACGGCGTGCAAGTTCAGCCGCTA<br>CCCCGACCACATGAAGCAGCACGACTTCTTCAAGTCC                                                                                                                                                                                                                                                                                                                                                                                                                                                                                                                                                                                                                                                                                                                                                                                                                                                                                                                                                                                                                                                                                                                                                                                                                                                                                                                                                                                                                                                                                                                                                                                                                                                                                                                                                                                                                                                                 |
| No mCherry                                           | GACTGCAGCCTCAGGAGATCTGAATTCTCCAGGCGATCTGACGG                                                                                                                                                                                                                                                                                                                                                                                                                                                                                                                                                                                                                                                                                                                                                                                                                                                                                                                                                                                                                                                                                                                                                                                                                                                                                                                                                                                                                                                                                                                                                                                                                                                                                                                                                                                                                                                                                                                                                                                                                                                                                                                                                                                                                                                                                                             |

**Table S7. Primers for PCRs for cloning.**

| PCR              | Primer name        | Primer sequence (5' -> 3')                                           | T <sub>a</sub> (°C) |
|------------------|--------------------|----------------------------------------------------------------------|---------------------|
| mCherry backbone | BglIII-mCherry     | ACTGCAGCCTCAGGAGATCTTTACTC<br>GTCCATGCCGCCGG                         | 70                  |
|                  | mCherry-EcoRI      | CAGATCGCCTGGAGAATTCATGGTG<br>AGCAAGGGCGAGGAG                         |                     |
| Wild-type        | BamHI WT           | CAGATCCGCTAGGGATCCCCACAAA<br>TGTGGGAGGGCG                            | 62                  |
|                  | $\beta$ Globin Rev | AAGCTTATCGATGCGGCCGCGGCAG<br>AATCCAGATGCTCAAGG                       |                     |
| ATG -> ACG       | BamHI Mut          | CAGATCCGCTAGGGATCCCCACAAA<br>CGTGGGAGGGCG                            | 62                  |
|                  | $\beta$ Globin Rev | AAGCTTATCGATGCGGCCGCGGCAG<br>AATCCAGATGCTCAAGG                       |                     |
| Optimized uORF   | BamHI Opt          | CAGATCCGCTAGGGATCCCCACAAA<br>TGGGGAGGGCGATAACCACTCGTTA<br>GAAAGCGTGA | 62                  |
|                  | $\beta$ Globin Rev | AAGCTTATCGATGCGGCCGCGGCAG<br>AATCCAGATGCTCAAGG                       |                     |
| Frame Shift      | eGFP internal      | AGCACGACTTCTTCAAGTCCGCCATG<br>CC                                     | 62                  |
|                  | $\beta$ Globin Rev | AAGCTTATCGATGCGGCCGCGGCAG<br>AATCCAGATGCTCAAGG                       |                     |

**Table S8. Primers for reporter construct sequence verification.**

| Primer name          | Primer sequence (5' -> 3')                        |
|----------------------|---------------------------------------------------|
| 5'UTR Rev            | CATAGCAAACCCGCGGGTGC                              |
| SMN 5'UTR            | AGAAGCCCCGGGCGGCGGAA                              |
| eGFP internal        | AGCACGACTTCTTCAAGTCCGCCATGCC                      |
| $\beta$ Glob Fwd ORF | CGGCATGGACGAGCTGTACAAGCTGCTGGTGGTCTACC<br>CTTGGAC |
| pBI CMV4 Rev         | TGGAGATATCGTCGACAAGC                              |
| mCherry seq Fwd      | AGTGCCACCTGACGTCGGCAG                             |
| mCherry seq Rev      | ATGTAACGCGGAACTCCATATATG                          |

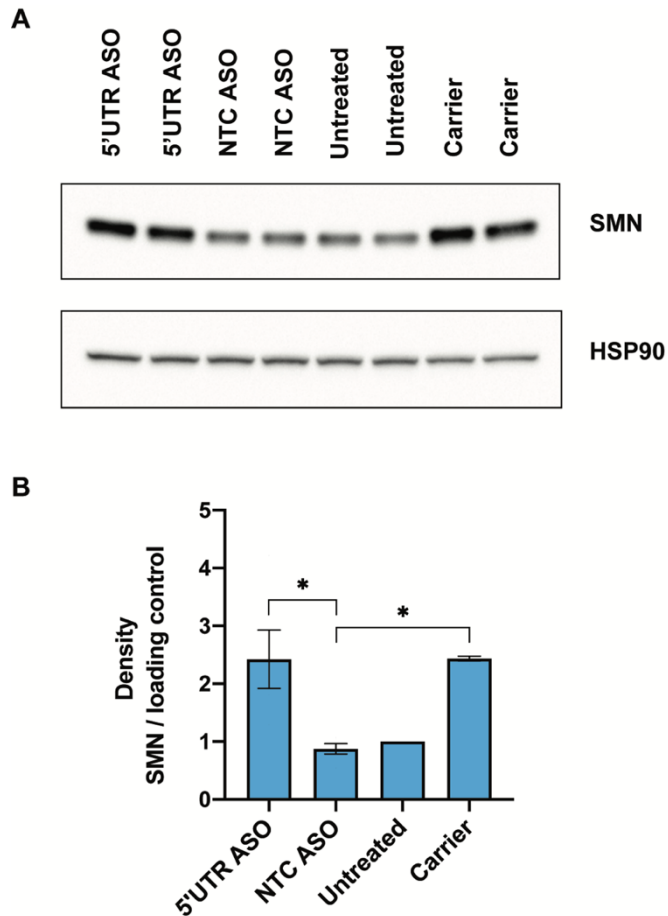

**Figure S1. The 5'UTR ASO is effective in a second SMA fibroblast cell line.**

A) Immunoblot (15  $\mu$ g per lane) showing SMN protein levels in GM03813 fibroblasts treated with 600 nM 5'UTR ASO #1 or a non-targeting control (NTC) ASO. B) SMN protein levels normalized to a loading control (alpha tubulin or HSP90) and then calculated as a fold change relative to SMN levels in untreated SMA patient cells. Error bars show SEM. Statistical significance determined by one-way ANOVA followed by Dunnett's test in comparison to NTC ASO. n = 5, except n = 4 for carrier;

\* p < 0.02.



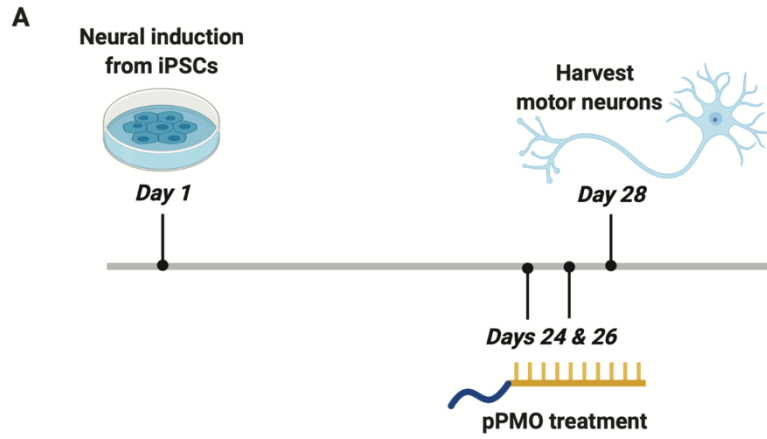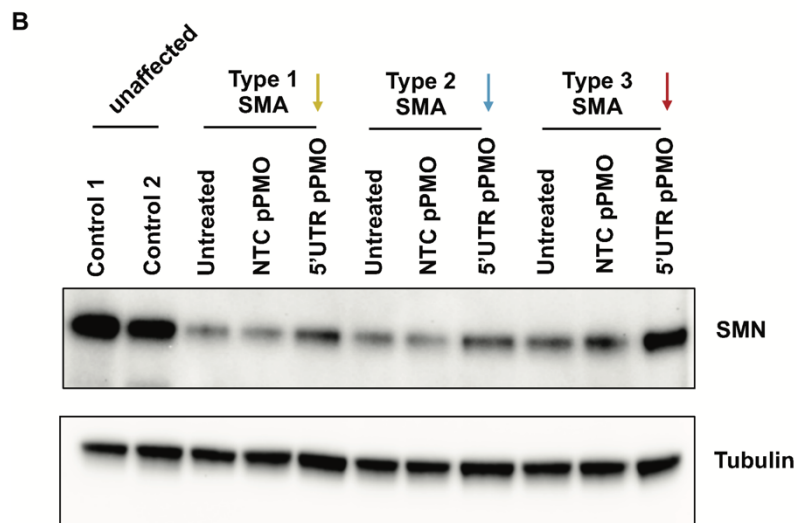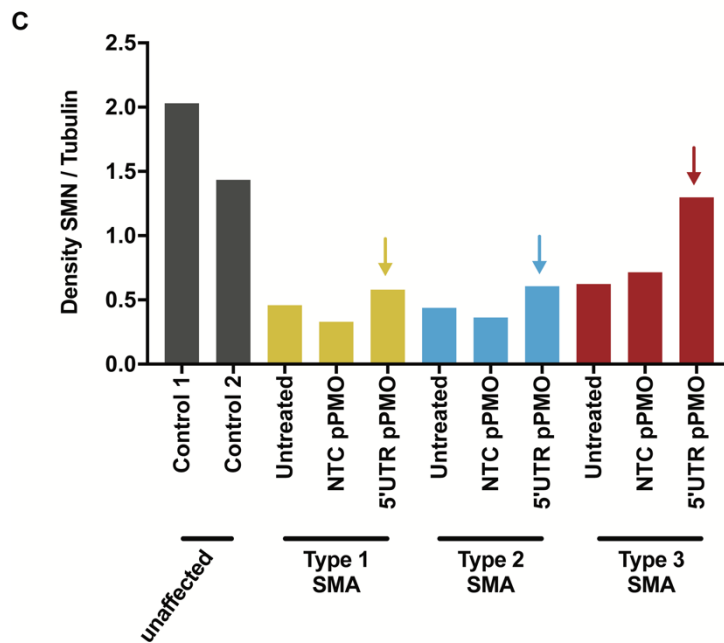

**Figure S2. The 5'UTR pPMO increases SMN protein levels in iPSC-derived motor neurons.**

A) A schematic drawing illustrating timing of treatment and protein extraction in the motor neuron differentiation process. In total, cells were exposed to pPMO for 4 days. B) Immunoblot (4-12% Bis-Tris gel) of motor neuron-like cells (MNs) chemically differentiated from iPSCs derived from control, Type 1 SMA, Type 2 SMA, or Type 3 SMA individuals. MNs were treated with 0.5  $\mu$ M 5'UTR pPMO or 1  $\mu$ M NTC pPMO. The NTC pPMO, which was developed for myotonic dystrophy (DM1),<sup>63</sup> targets the CUG expansion in *DMPK* and we did not expect it to change *SMN2* expression. C) Densitometry from immunoblot in panel B. SMN protein levels were normalized to alpha tubulin. n = 1 per cell line.

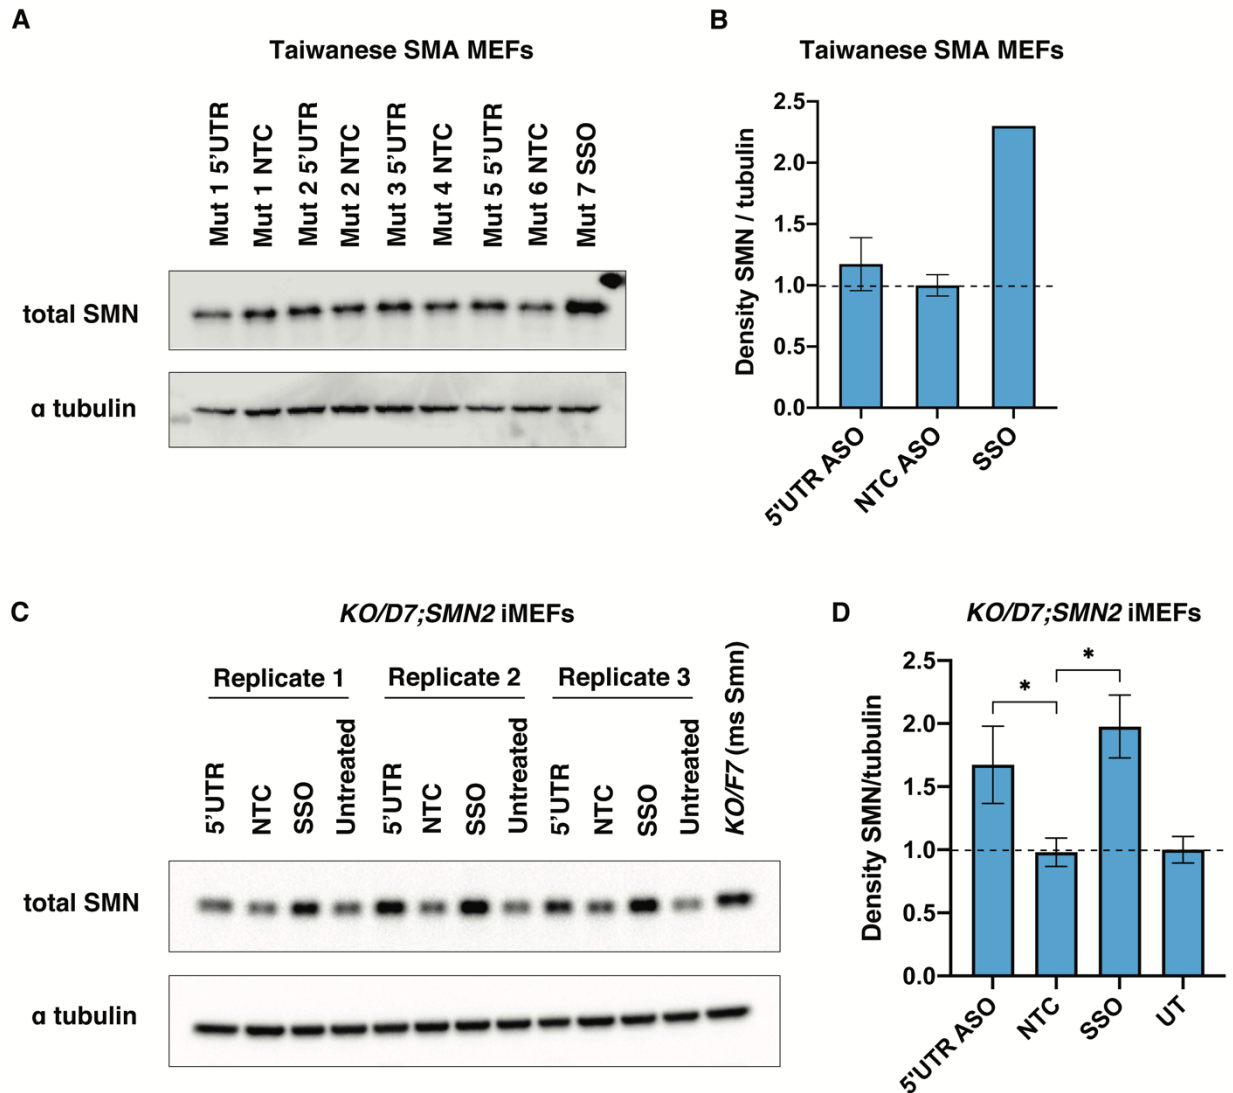

**Figure S3. Effect of the 5'UTR ASO in cultured mouse cells.**

A) Immunoblot (20  $\mu$ g per lane) showing SMN protein levels from Taiwanese mouse embryonic fibroblasts treated with 150 nM 2'-MOE ASOs. The SSO (targeting the ISSN1 sequence) was used as a transfection positive control and was in the 2'OMe chemistry. Mut = mutant (SMA genotype). The number in the sample name indicates the embryo from which cells were isolated and grown. B) Densitometry from immunoblot in panel A. SMN protein levels were normalized to alpha tubulin and then calculated as a fold change relative to SMN levels in cells treated with the NTC ASO. Error bars

show propagated error. C) Immunoblot (15  $\mu$ g per lane) showing SMN protein levels from *KO/D7;SMN2* mouse embryonic fibroblasts<sup>37</sup> treated with 300 nM 2'-MOE ASOs. *KO/F7* has one copy of the mouse *Smn* gene. D) Densitometry from immunoblot in panel C. SMN protein levels were normalized to alpha tubulin and then calculated as a fold change relative to SMN levels in untreated cells. Error bars show propagated error. \*  $p < 0.05$ .

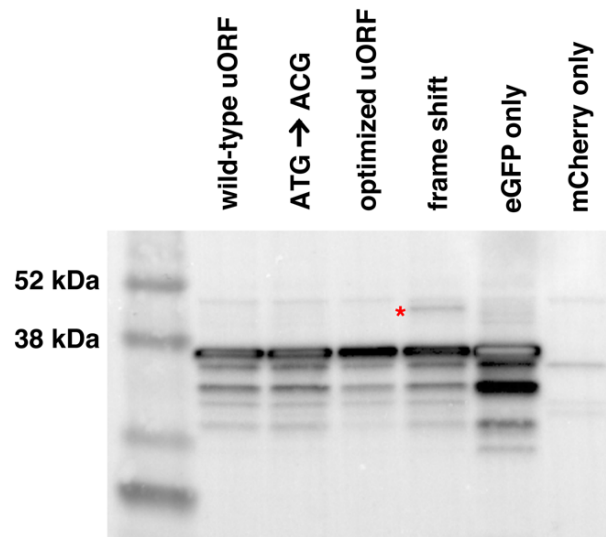

**Figure S4. Translation that begins at the upstream start codon is rare (or slow).**

The wild-type eGFP fusion protein is 39 kDa. The protein encoded by the frame shift reporter has 53 additional amino acids (encoded by the 5'UTR) and is 45 kDa. This protein is indicated by the red asterisk. The signal from the higher molecular weight protein is visible only after the signal from the canonical protein is saturated.

**A**

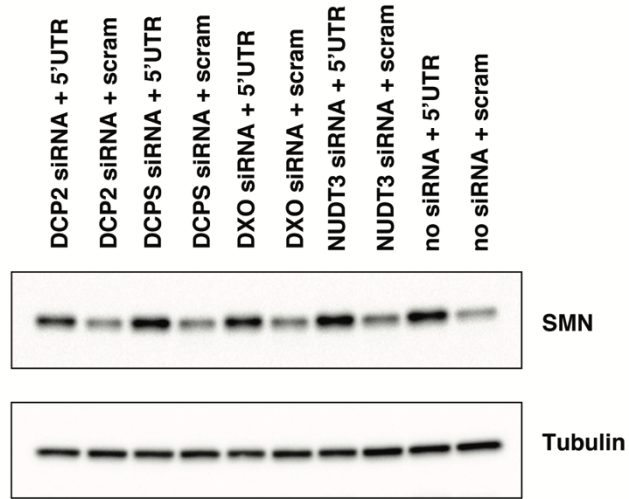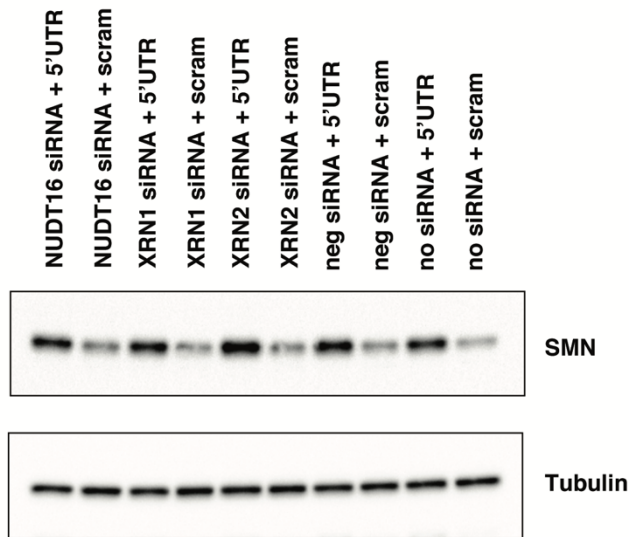

**B**

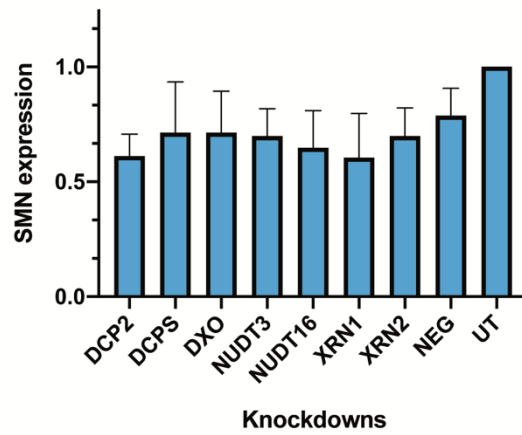

**Figure S5. Knockdown of decapping factors and exoribonucleases does not abrogate 5'UTR ASO activity.** Enzymes involved in RNA decay were knocked down with 100 nM siRNA in GM0232 (SMA) fibroblasts. The next day, the cells were transfected with 300 nM 5'UTR 2'-MOE or scrambled 2'-MOE. A) Immunoblots (15  $\mu$ g per lane) showing SMN protein levels in SMN-deficient fibroblasts treated with siRNA and ASO combinations indicated. B) SMN protein levels were normalized to alpha tubulin and then calculated as a fold change relative to normalized SMN levels in cells treated with ASO but not siRNA. UT = no siRNA treatment. Error bars show SEM. There was no statistical significance between conditions, as determined by one-way ANOVA followed by Dunnett's test in comparison to NTC. n = 3/4.
